# Supplementary material for: Genome-wide characterization of the SPL gene family involved in the age development of Jatropha curcas
Source: PubMed Central journal article supplement (PMC7238634; doi:10.1186/s12864-020-06776-8), 2020-05-20

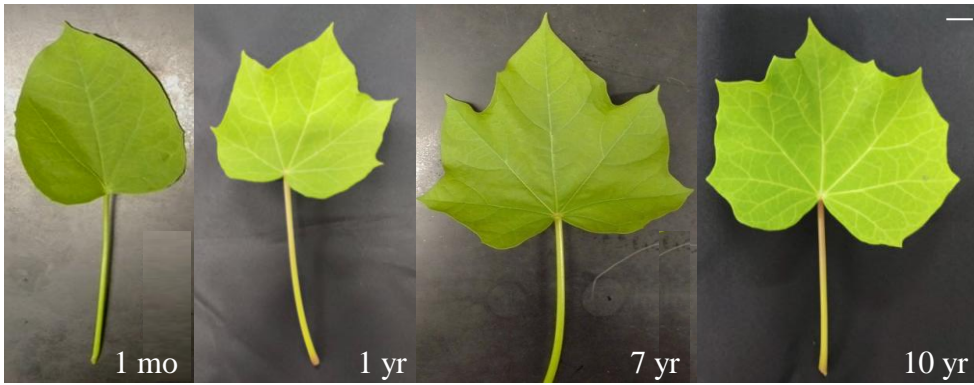

Supplement: 12864_2020_6776_MOESM13_ESM.pdf [file 12864_2020_6776_MOESM13_ESM.pdf]
